# Supplementary material
Source: Springer Nature journal article supplement (https://www.springermedizin.de/resource/supplementary/12885_2009_1603_MOESM3_ESM.pdf/9472444)

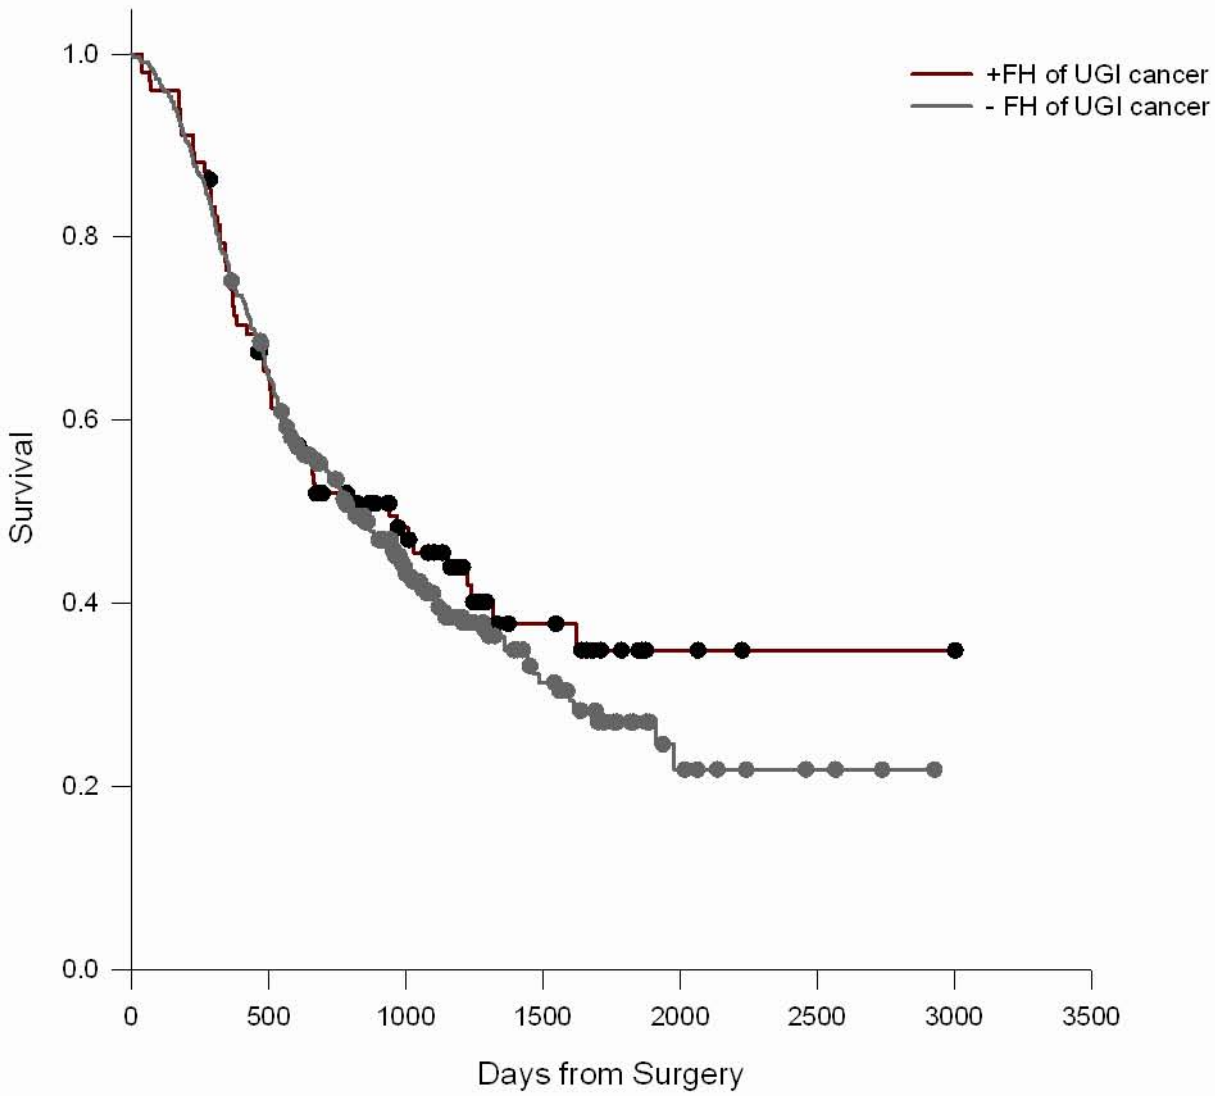

Supplement: MOESM3 [file 9472444]
